# Supplementary material for: Modeling human somite development and fibrodysplasia ossificans progressiva with induced pluripotent stem cells
Source: Oxford University Press journal article supplement (doi:10.1242/dev.165431), 2018-08-15
Supplement: dev165431supp.pdf [file dev165431supp.pdf]

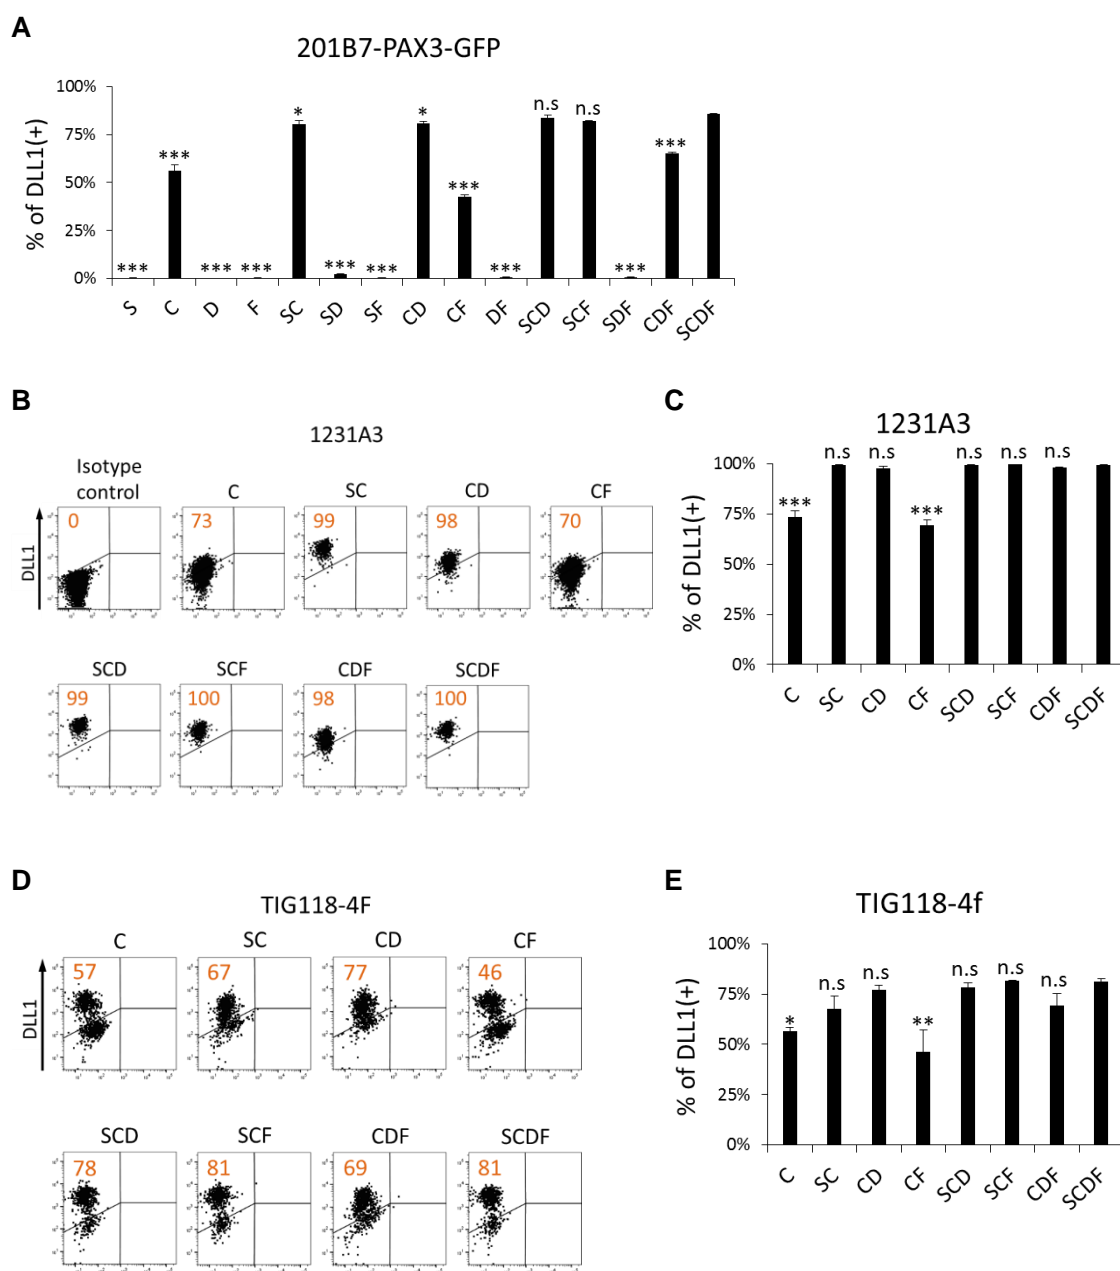

**Figure S1. Investigation of optimal protocol for PSM induction.**

(A-E) FACS analysis using anti-DLL1 antibody. 201B7-PAX3-GFP (A), 1231A3 (B-C) and TIG118-4f (D-E) iPSC lines were cultured in various conditions, and the induction efficiencies were assessed at day 4 by FACS. Error bars: mean  $\pm$  SE (n=3). \*p < 0.05; \*\*p < 0.01; \*\*\*p < 0.001 by Dunnett's multiple comparisons *t*-test compared with SCDF. n.s, no significant difference.

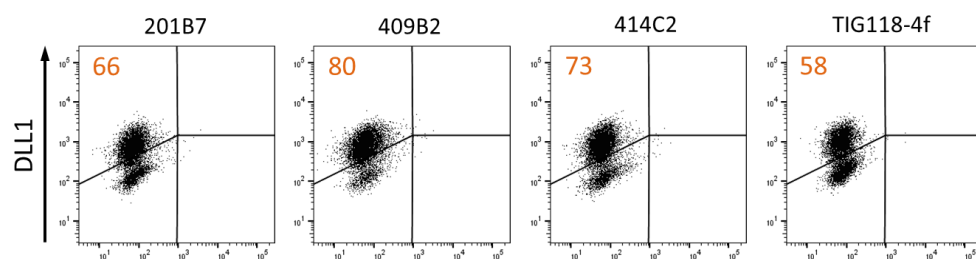

**Figure S2. Induction of PSM with various iPSCs.**

FACS analysis using anti-DLL1 antibody showed robustness of the induction protocol. 201B7, TIG118-4f, 414C2 and 409B2 iPSC lines were cultured in SCDF condition, and the induction efficiencies were assessed at day 4 by FACS.

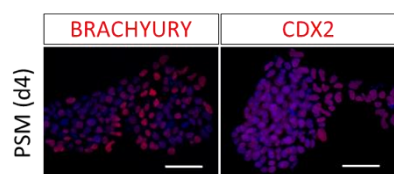

**Figure S3. Immunocytochemistry analysis of induced PSM.**

Immunocytochemistry analysis at day 4 of PSM induction. Cells were stained with anti-BRACHYURY and anti-CDX2 antibodies and co-stained with DAPI. Scale bars: 50  $\mu$ m.

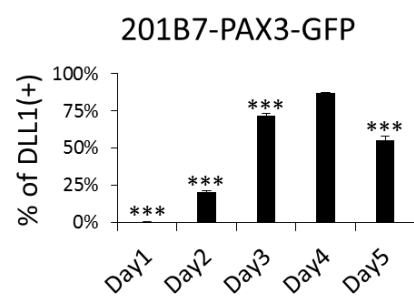

**Figure S4. Investigation of optimal day for PSM induction.**

FACS analysis using anti-DLL1 antibody. 201B7-PAX-GFP iPSCs were cultured in SCDF, and the induction efficiency was assessed from day 1 until day 5 by FACS. Error bars: mean  $\pm$  SE (n=3). \*\*\* p < 0.001 by Dunnett's multiple comparisons *t*-test compared with day 4.

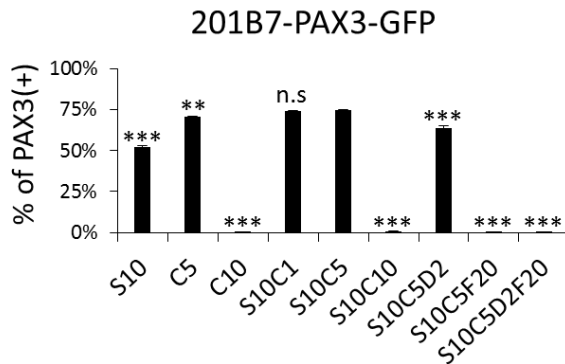

**Figure S5. Investigation of optimal protocol for SM induction.**

Characterization of SM induced by various conditions. The induction efficiencies were assessed by PAX3-GFP FACS analysis. Error bars: mean  $\pm$  SE (n=3). \*\*p < 0.01; \*\*\* p < 0.001 by Dunnett's multiple comparisons *t*-test compared with S10C5. n.s, no significant difference.

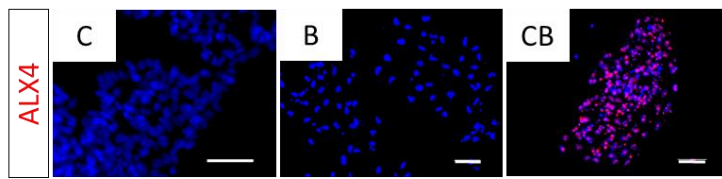

**Figure S6. DM induction with CHIR99021 and BMP4.**

Immunocytochemistry analysis at day 3 of DM induction. Cells were stained with anti-ALX4 antibody and co-stained with DAPI. Both CHIR99021 and BMP4 were necessary to induce DM. Scale bars: 50  $\mu$ m. C, CHIR99021 5  $\mu$ M; B, BMP4 10 ng/mL.

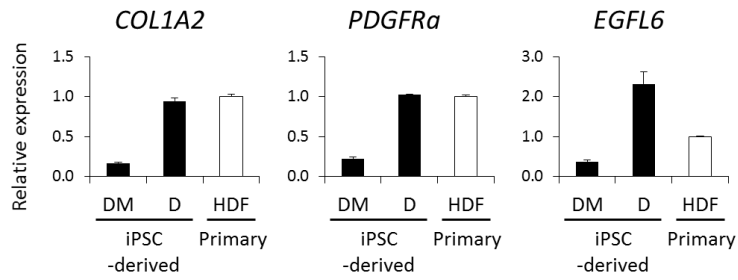

**Figure S7. Comparative analysis of iPSC-derived dermatome and primary adult dermal fibroblast.**

Gene expressions of dermatome and dermal fibroblast-related markers in induced D and primary HDFs were analyzed by RT-qPCR. Error bars: mean  $\pm$  SE (n=3). HDF, human dermal fibroblasts.

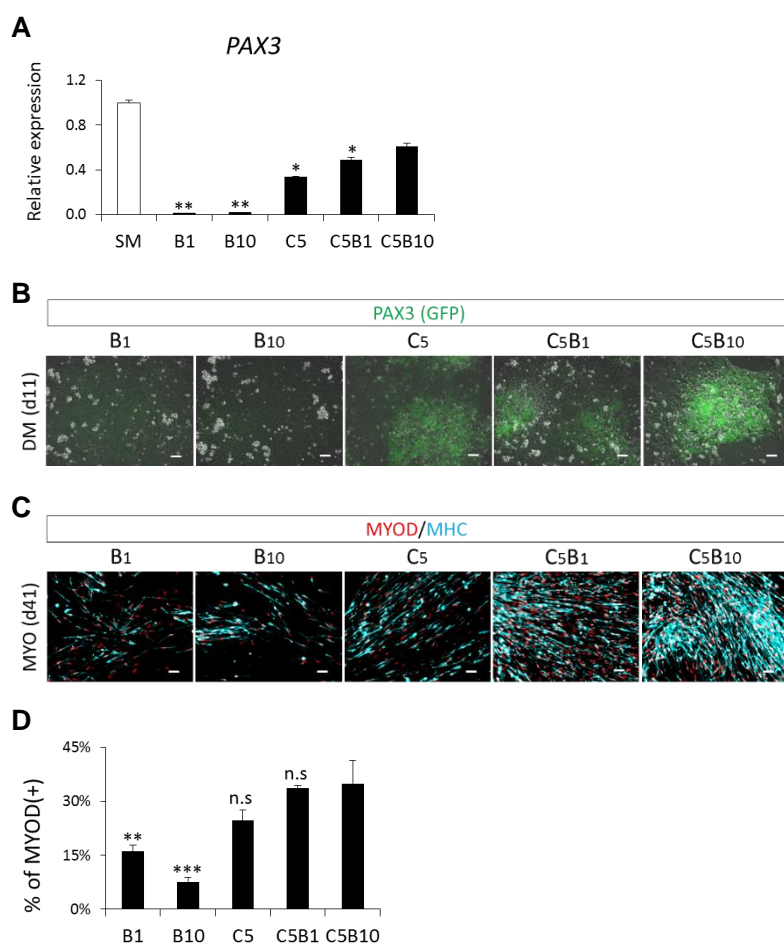

**Figure S8. Optimal protocol for DM induction.**

**(A-B)** Characterization of DM induced by various conditions. Quality of induced DM was assessed by RT-qPCR **(A)** and PAX3-GFP fluorescence **(B)** analyses.

**(C-D)** Characterization of MYO differentiated from DM. Quality of induced MYO was assessed by immunocytochemistry analysis **(C)**. Induction efficiencies **(D)**. Error bars: mean  $\pm$  SE (n=3). \*\*\*  $p < 0.001$ ; \*\*  $p < 0.01$ ; \*  $p < 0.05$  by Dunnett's multiple comparisons  $t$ -test compared with C5B10 (A, D). n.s, no significant difference. Scale bars: 50  $\mu$ m.



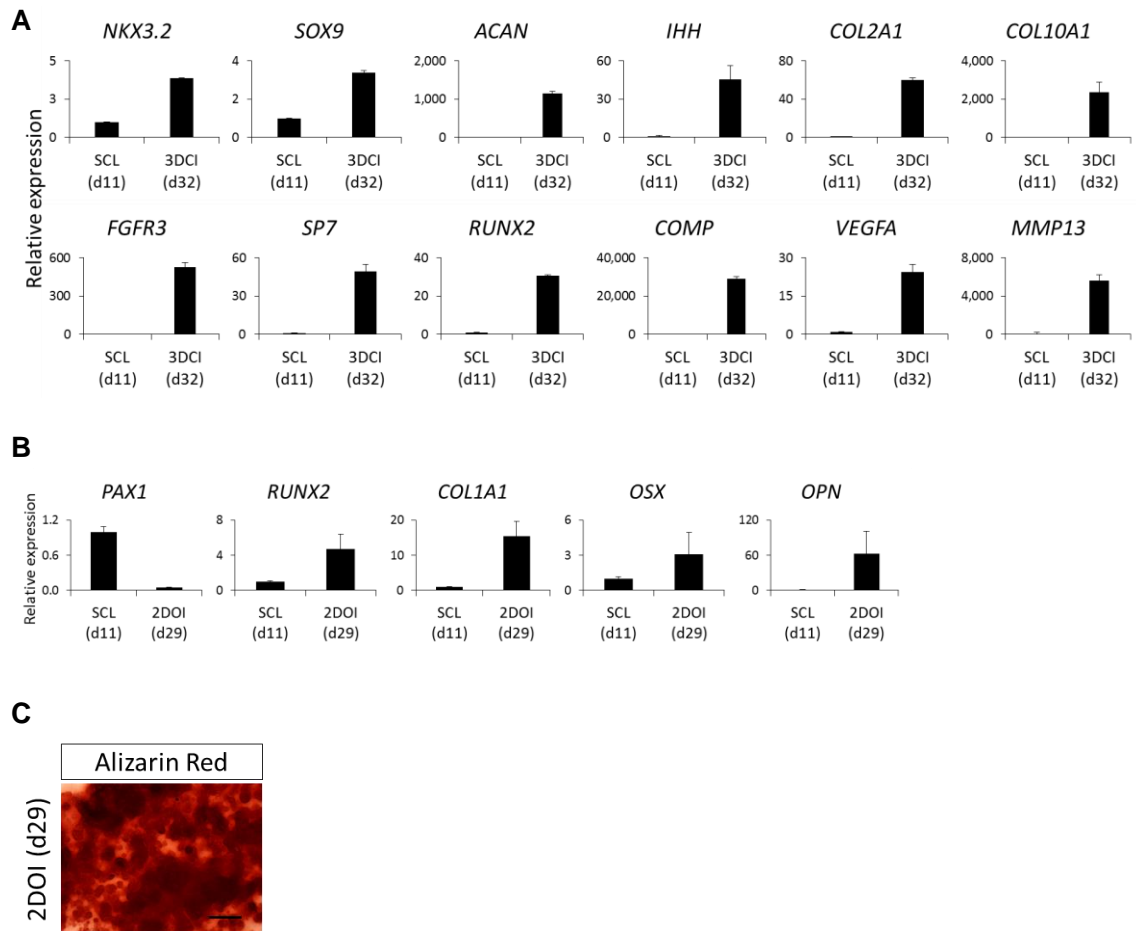

**Figure S9. Successful chondrogenesis and osteogenesis from SCL.**

**(A)** RT-qPCR analysis using cartilage markers at day 21 of 3DCI.

**(B and C)** Differentiation ability of SCL toward osteocytes was assessed by RT-qPCR analysis **(B)** and Alizarin Red staining **(C)** at day 18 of 2DOI. Error bars: mean  $\pm$  SE (n=3).

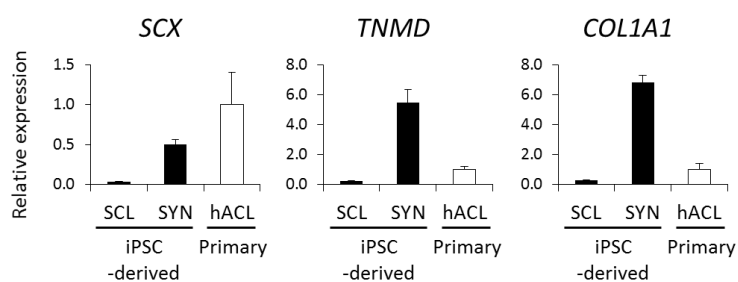

**Figure S10. Comparative analysis of iPSC-derived syndetome and primary anterior cruciate ligament cells.**

Gene expressions of syndetome-related markers in induced SYN and primary ACL cells were analyzed by RT-qPCR. Error bars: mean  $\pm$  SE (n=3). ACL, anterior cruciate ligament.

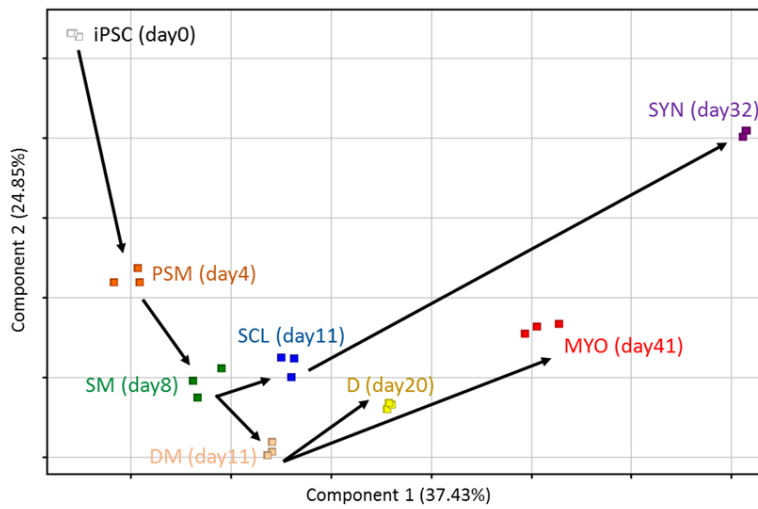

**Figure S11. Stepwise induction of four SM derivatives shown by global gene expression analyses.**

A PCA plot showing stepwise induction from iPSCs to four derivatives through PSM and SM fates. Three samples were prepared for each lineage.

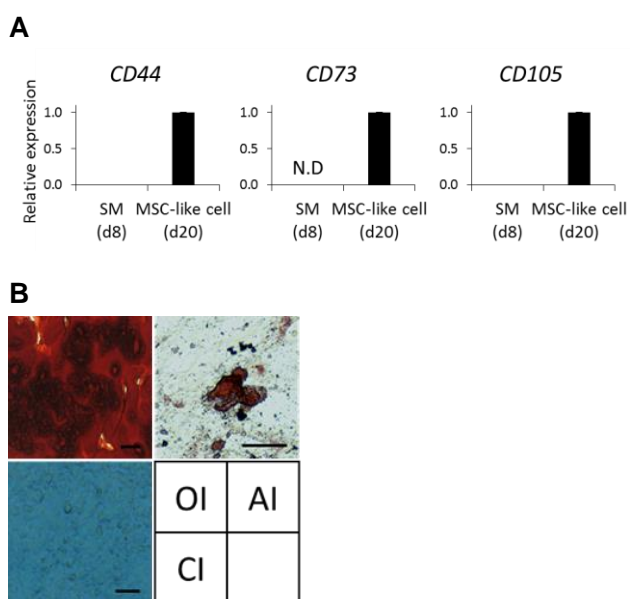

**Figure S12. Generation of MSC-like cells from SM.**

**(A)** RT-qPCR analysis of MSC markers at day 12 of the MSC-like cell induction. Error bars: mean  $\pm$  SE (n=3). N.D, not detected.

**(B)** Differentiation properties of induced MSC-like cells. The induction of osteogenic, chondrogenic and adipogenic lineages was assessed by Alizarin Red staining (OI), Alcian Blue staining (CI) and Oil Red O staining (AI). Scale bars: 50  $\mu$ m. OI, osteogenic induction; CI, chondrogenic induction; AI, adipogenic induction.

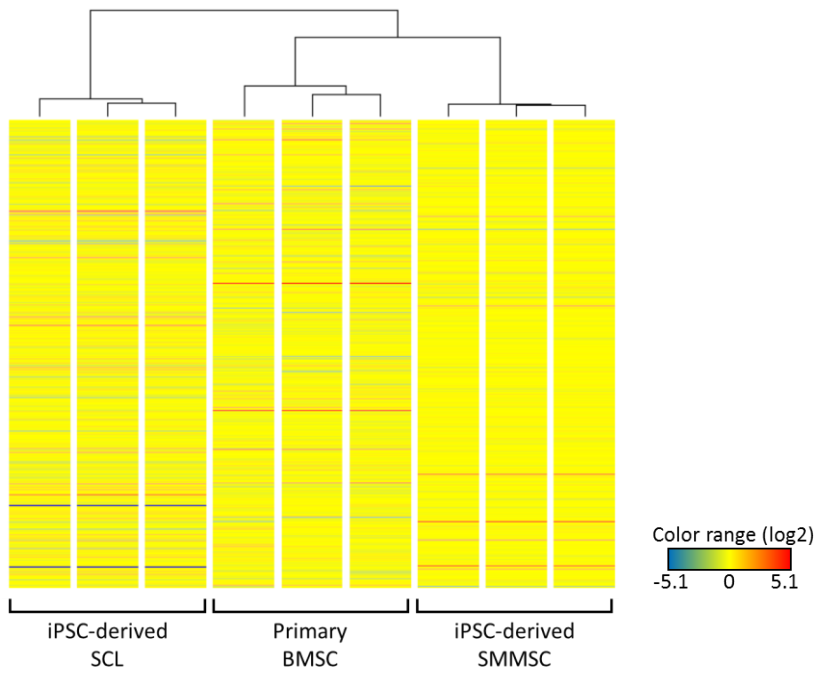

**Figure S13. Hierarchical cluster analysis of iPSC-derived SCL, SMMSC-like cell, and primary BMSC.**

Genome wide microarray analysis among iPSC-derived SCL, SMMSC-like cells, and primary BMSCs. BMSC, bone marrow mesenchymal stromal cell.

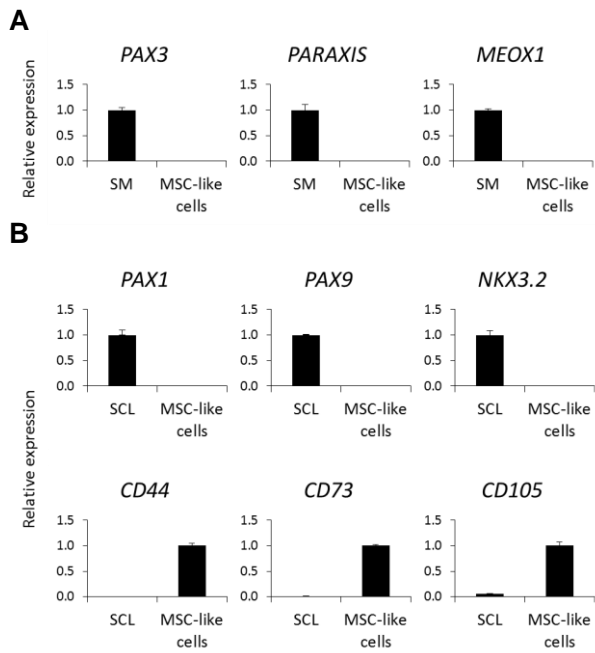

**Figure S14. Characterization of induced SM, SCL and MSC-like cells.**

(A) Expression comparison of induced SM and MSC-like cells by RT-qPCR analysis.

(B) Expression comparison of induced SCL and MSC-like cells by RT-qPCR analysis.

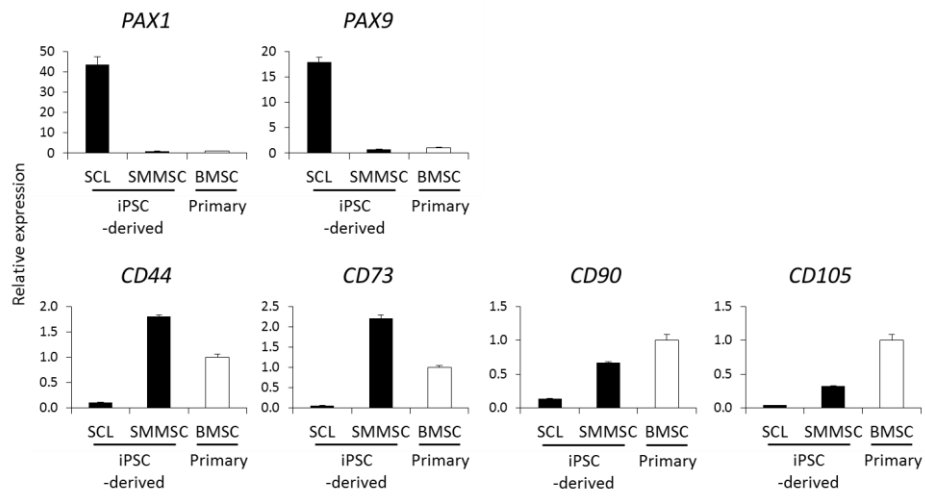

**Figure S15. Comparative analysis of iPSC-derived SCL, SMMSC-like cell, and BMSC.** Gene expressions of SCL and MSC-related markers in induced SCL, SMMSC-like cells, and primary BMSCs were analyzed by microarray. Error bars: mean  $\pm$  SE (n=3).

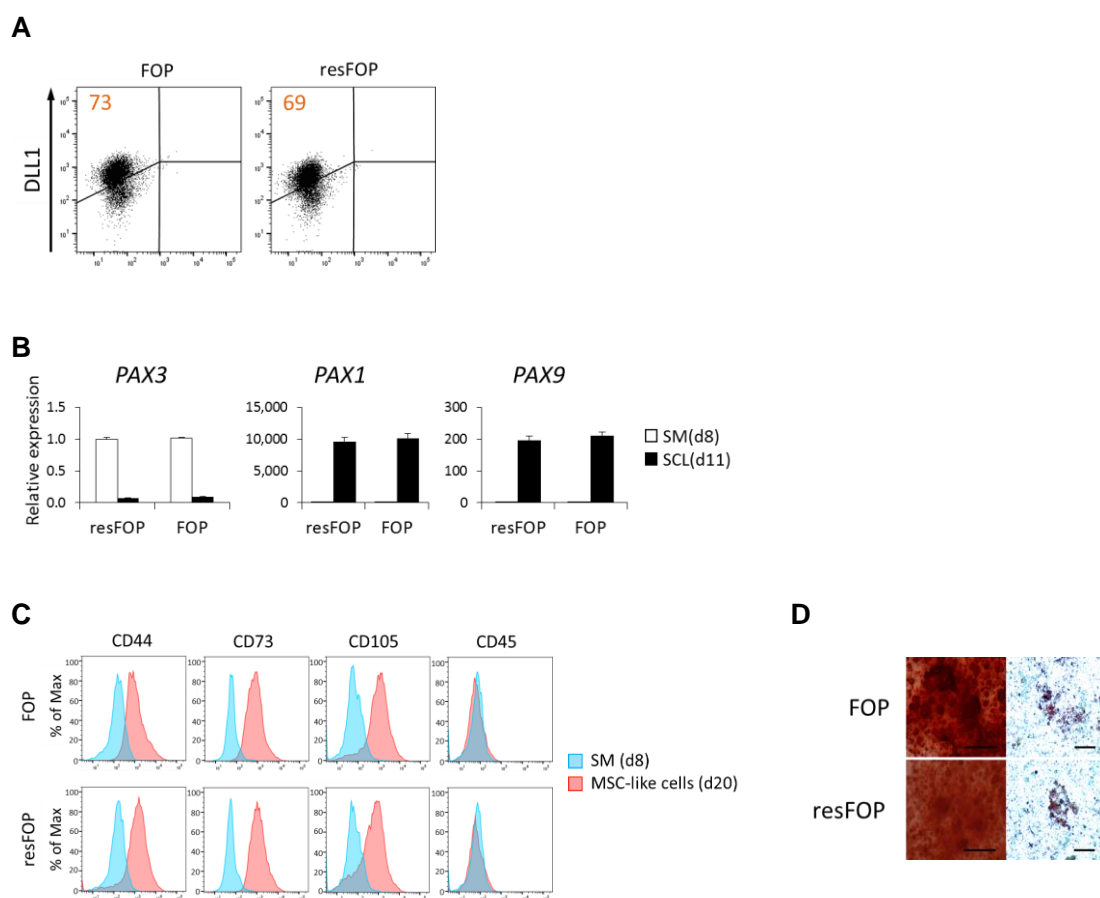

**Figure S16. Generation of SCL and MSC-like cells using FOP-iPSCs and resFOP-iPSCs.**

**(A)** DLL1<sup>+</sup> cells induced from FOP-iPSCs and resFOP-iPSCs were collected by FACS at day 4 of PSM induction.

**(B)** Generation of SCL using FOP-iPSCs and resFOP-iPSCs. RT-qPCR analysis using SM and SCL markers at day 3 of SCL induction. Error bars: mean  $\pm$  SE (n=3).

**(C-D)** Generation of MSC-like cells using FOP-iPSCs and resFOP-iPSCs. Expressions of surface markers for MSCs were assessed by FACS at day 12 of MSC-like cell induction **(C)**. Differentiation properties of MSC-like cells were assessed by osteogenic and adipogenic induction. These inductions were evaluated by Alizarin Red staining (OI) and Oil Red O staining (AI), respectively **(D)**. Both FOP-MSC-like cells and resFOP-MSC-like cells underwent osteogenic differentiation well, with no difference between them. Scale bars: 50  $\mu$ m. resFOP, Patient 1 resFOP clone 1; FOP, Patient 1 FOP clone 1.



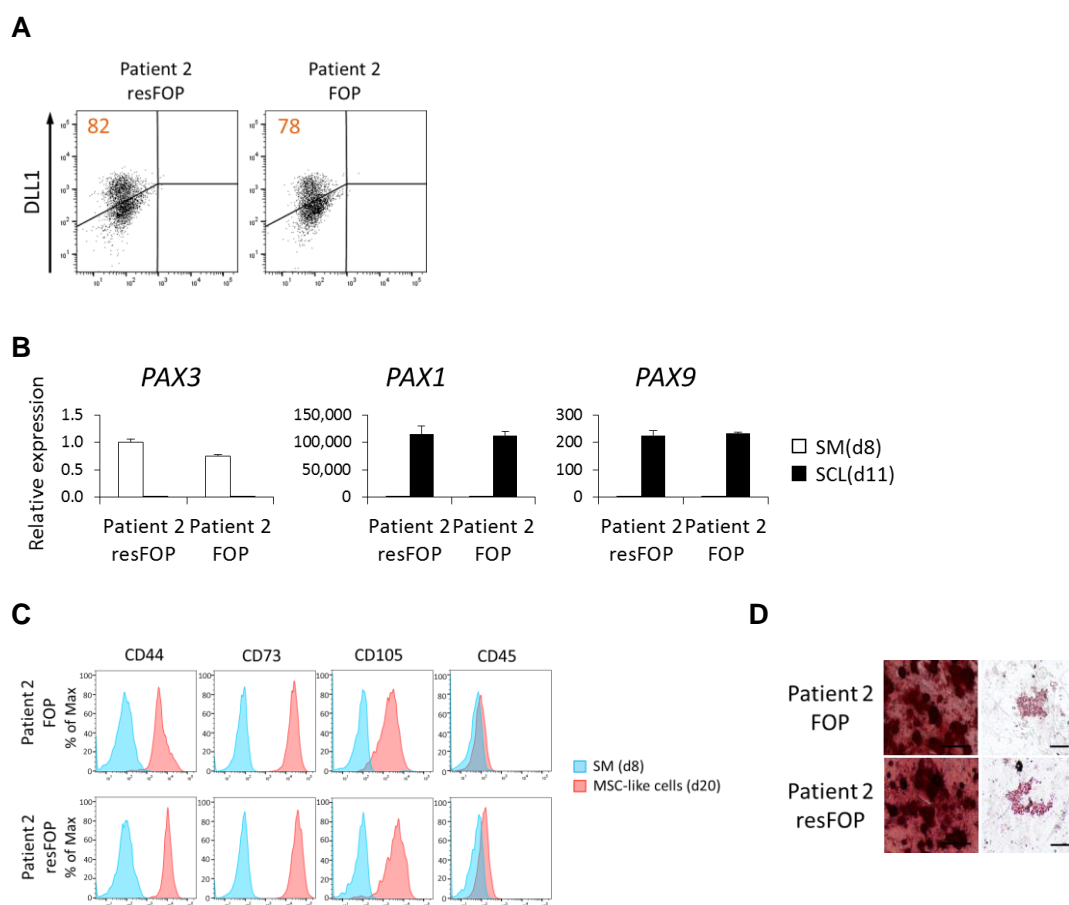

**Figure S17. Generation of SCL and MSC-like cells from Patient 2 FOP-iPSCs and resFOP-iPSCs.**

**(A)** DLL1<sup>+</sup> cells induced from Patient 2 FOP-iPSCs and resFOP-iPSCs were collected by FACS at day 4 of PSM induction.

**(B)** Generation of SCL derived from Patient 2 FOP-iPSCs and resFOP-iPSCs. RT-qPCR analysis using SM and SCL markers at day 3 of SCL induction. Error bars: mean  $\pm$  SE (n=3).

**(C-D)** Generation of MSC-like cells from Patient 2 FOP-iPSCs and resFOP-iPSCs. Expressions of surface markers for MSCs were assessed by FACS at day 12 of MSC-like cell induction **(C)**. Differentiation properties of MSC-like cells were assessed by osteogenic and adipogenic induction. These inductions were evaluated by Alizarin Red staining (OI) and Oil Red O staining (AI), respectively **(D)**. Scale bars: 50  $\mu$ m; Patient 2 resFOP, Patient 2 resFOP clone 1; Patient 2 FOP, Patient 2 FOP clone 1.

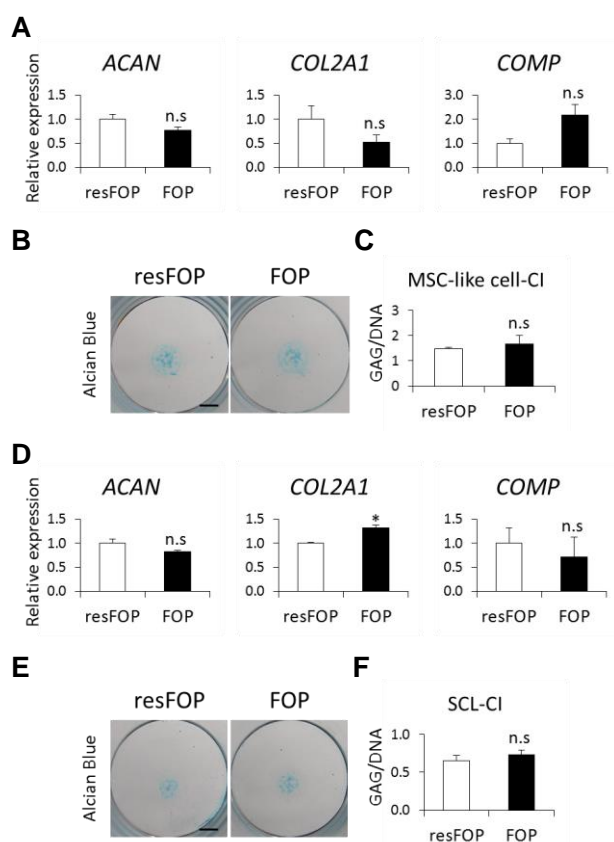

**Figure S18. MSC-like cell-Cl and SCL-Cl derived from FOP-iPSCs and resFOP-iPSCs without Activin A.**

**(A-C)** Evaluation of MSC-like cell-Cl derived from FOP-iPSCs and resFOP-iPSCs without Activin A. Chondrogenic differentiation was assessed at day 5 of CI by RT-qPCR analysis **(A)**, Alcian Blue staining **(B)** and GAG/DNA analysis **(C)**.

**(D-F)** Evaluation of SCL-Cl derived from FOP-iPSCs and resFOP-iPSCs without Activin A. Chondrogenic differentiation was assessed at day 5 of CI by RT-qPCR analysis **(D)**, Alcian Blue staining **(E)** and GAG/DNA analysis **(F)**. Error bars: mean  $\pm$  SE (n=3). \*p < 0.05 by Student's *t*-test compared with resFOP (A, C, D and F). Scale bars: 200  $\mu$ m; n.s, no significant difference; resFOP, Patient 1 resFOP clone 1; FOP, Patient 1 FOP clone 1.

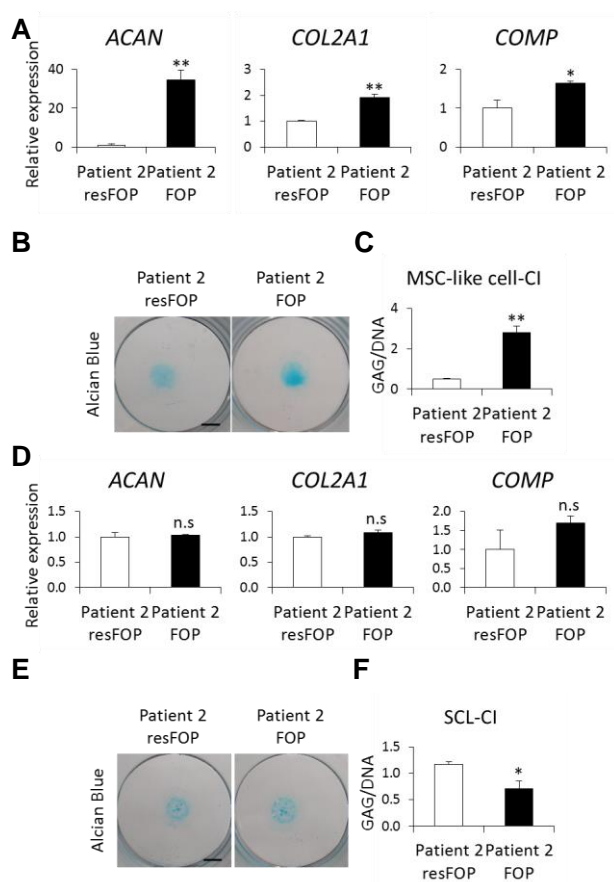

**Figure S19. MSC-like cell-Cl and SCL-Cl derived from Patient 2 FOP-iPSCs and resFOP-iPSCs.**

**(A-C)** Evaluation of MSC-like cell-Cl derived from Patient 2 FOP-iPSCs and resFOP-iPSCs. Chondrogenic differentiation was assessed at day 5 of Cl by RT-qPCR analysis **(A)**, Alcian Blue staining **(B)** and GAG/DNA analysis **(C)**.

**(D-F)** Evaluation of SCL-Cl derived from Patient 2-FOP-iPSCs and resFOP-iPSCs. Chondrogenic differentiation was assessed at day 5 of Cl by RT-qPCR analysis **(D)**, Alcian Blue staining **(E)** and GAG/DNA analysis **(F)**. Error bars: mean  $\pm$  SE (n=3). \* $p < 0.05$ ; \*\* $p < 0.01$  by Student's *t*-test compared with Patient 2 resFOP (A, C, D and F). n.s, no significant difference; Scale bars: 200  $\mu$ m.

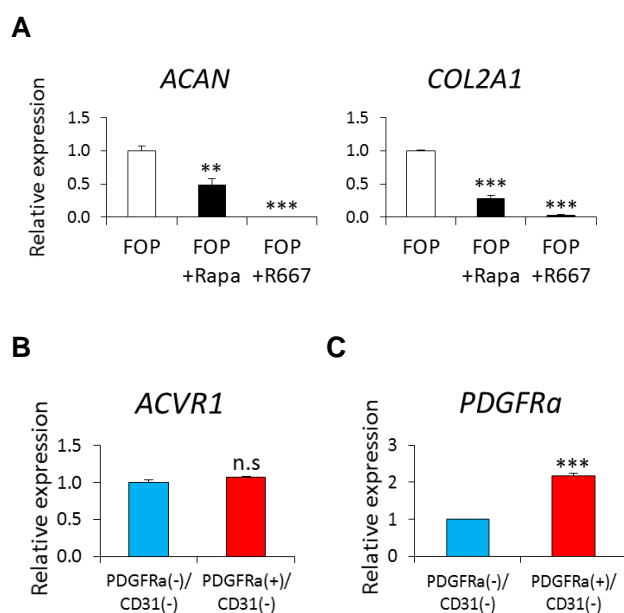

**Figure S20. Characterization of FOP-iPSC-derived MSC-like cells and MSC-like cell-CI.**

**(A)** Evaluation of R667 and Rapamycin treatment on chondrogenesis. Chondrogenic differentiation was assessed by RT-qPCR analysis. Cells were harvested at day 5 of 2DCI and treated with or without R667, Rapamycin.

**(B and C)** Evaluation of isolated PDGFRa<sup>+</sup>/CD31<sup>-</sup> MSC-like cells and PDGFRa<sup>-</sup>/CD31<sup>-</sup> MSC-like cells. *ACVR1* **(B)** and *PDGFRa* **(C)** expression were assessed by RT-qPCR analysis. Error bars: mean ± SE (n=3). \*\*\*p < 0.001 by Student's *t*-test compared with FOP (A) and PDGFRa<sup>-</sup>/CD31<sup>-</sup> population (B and C). Rapa, Rapamycin; n.s, no significant difference.

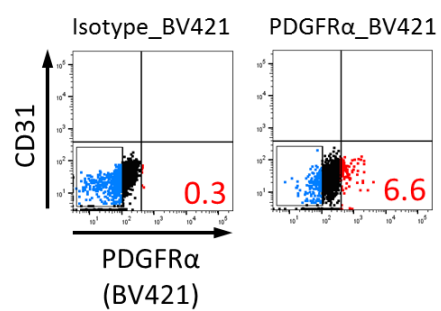

**Figure S21. Staining of isotype control antibody for PDGFRα.**

FACS analysis of SMMSC-like cells induced from FOP-iPSCs using isotype control antibody for PDGFRα.

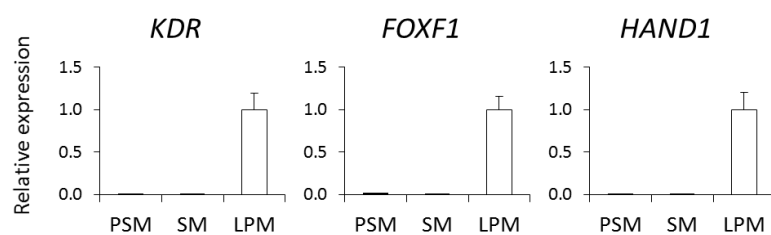

**Figure S22. Monitoring contamination of LPM cells at PSM and SM stages.**

Contamination of LPM cells in PSM and SM stage was assessed by RT-qPCR using LPM-related markers. iPSC-derived LPM were acquired by the following published protocols (Iyer *et al.*, 2015).

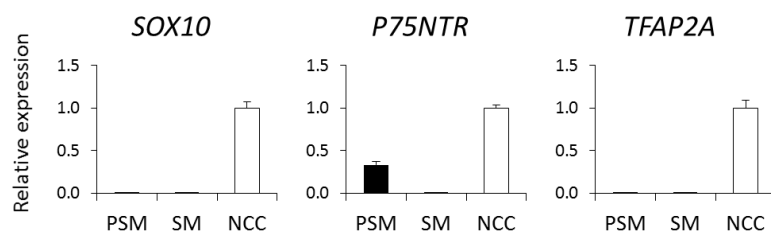

**Figure S23. Monitoring contamination of NCCs at PSM and SM stages.**

Contamination of NCCs in PSM and SM stages was assessed by RT-qPCR using NCC-related markers. iPSC-derived NCC were acquired by the following published protocols (Fukuta *et al.*, 2014).

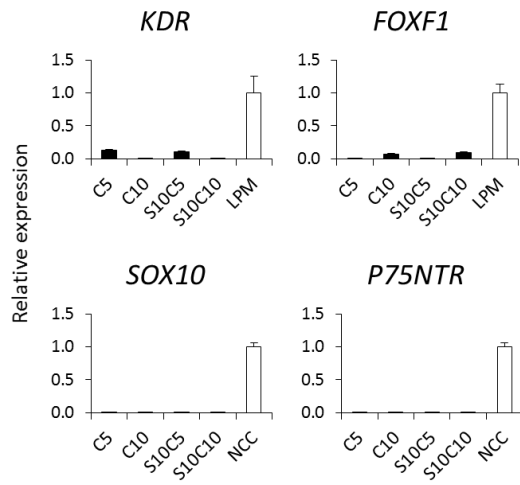

**Figure S24. Monitoring contamination of LPM cells and NCCs in SM induced with various conditions.**

Contaminations of LPM cells and NCCs were assessed by RT-qPCR. Error bars: mean  $\pm$  SE (n=3).



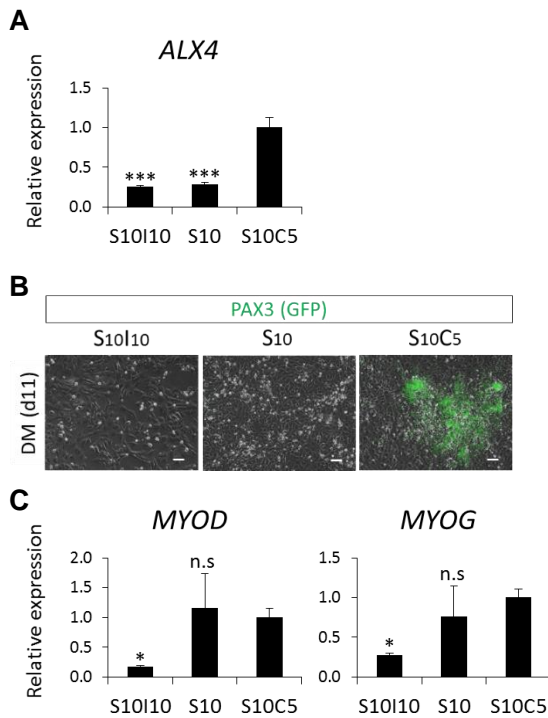

**Figure S25. Characterization of DM and MYO differentiated from SM induced with S10I10, S10 or S10C5.**

**(A-B)** Quality of induced DM was assessed by RT-qPCR **(A)** and PAX3-GFP fluorescence **(B)** analyses. Scale bars: 50  $\mu$ m.

**(C)** Quality of induced MYO was assessed by RT-qPCR analysis. Error bars: mean  $\pm$  SE (n=3). \*\*\*  $p < 0.001$ ; \*  $p < 0.05$  by Dunnett's multiple comparisons  $t$ -test compared with S10C5 (A, C). n.s, no significant difference.

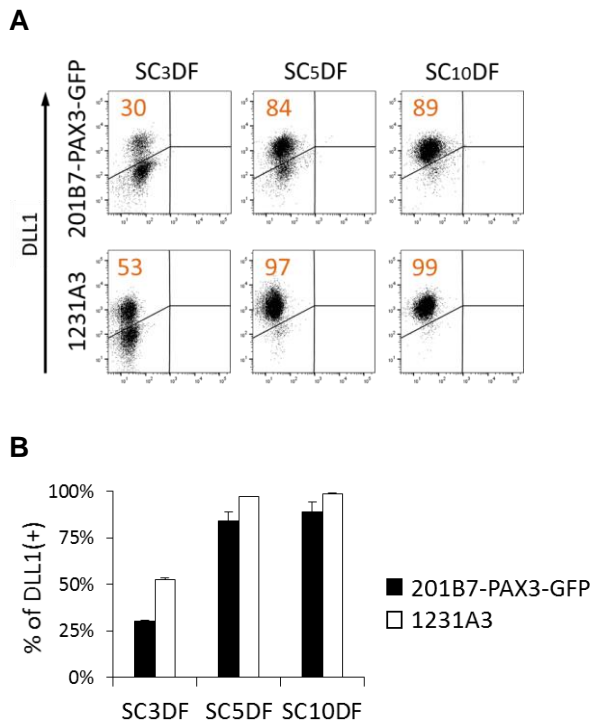

**Figure S26. Effect of CHIR99021 concentration during PSM differentiation.**

**(A-B)** FACS analysis at day 4 using anti-DLL1 antibody. iPSC lines, 201B7-PAX3-GFP and 1231A3 were cultured in various CHIR99021 concentrations (SC3DF, SC5DF, SC10DF). Error bars: mean  $\pm$  SE (n=3). S, SB431542 10  $\mu$ M; C3, CHIR99021 3  $\mu$ M; C5, CHIR99021 5  $\mu$ M; C10, CHIR99021 10  $\mu$ M; D, DMH1 2  $\mu$ M; F, FGF2 20 ng/mL.

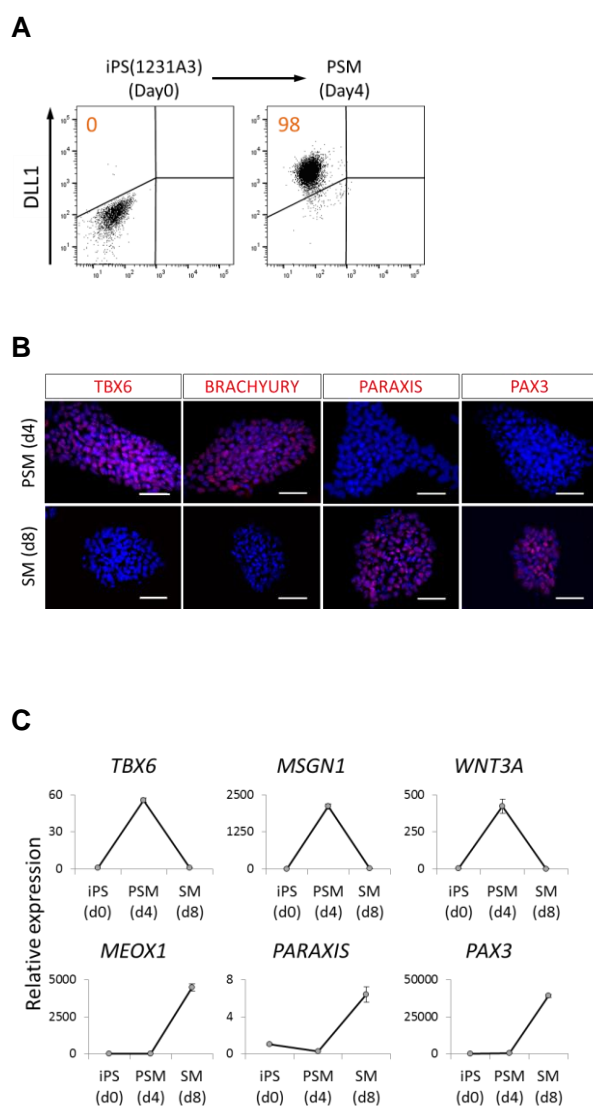

**Figure S27. Induction of SM through PSM fate in xeno-free condition.**

**(A-C)** Induction of SM through PSM fate in xeno-free condition. 1231A3, xeno-free and feeder-free iPSCs were used for the experiments. DLL1<sup>+</sup> cells were collected by FACS at day 4 of induced PSM **(A)**. Differentiation toward SM through PSM fate was assessed by immunocytochemistry **(B)** and RT-qPCR **(C)** analyses. Error bars: mean  $\pm$  SE (n=3). Scale bars: 50  $\mu$ m.

**Table S1. Primer sequences for qPCR analysis.**

| NAME                            | Forward                   | Reverse                  |
|---------------------------------|---------------------------|--------------------------|
| <i>ACTB</i>                     | CACCATTGGCAATGAGCGGTTC    | AGGTCTTTGCGGATGTCCACGT   |
| <i>NANOG</i>                    | GGCTCTGTTTTGCTATATCCCCTAA | CATTACGATGCAGCAAATACAAGA |
| <i>OCT3/4</i>                   | AGACCATCTGCCGCTTTGAG      | GCAAGGGCCGCAGCTT         |
| <i>SOX2</i>                     | TGGTCCTGCATCATGCTGTAG     | AACCAGCGCATGGACAGTTAC    |
| <i>TBX6</i>                     | AGCCTGTGTCTTTCCATCGT      | AGGCTGTACGGAGATGAAT      |
| <i>MSGN1</i>                    | GGAGAAGCTCAGGATGAGGA      | GTCTGTGAGTCCCCGATGT      |
| <i>WNT3A</i>                    | CAAGATTGGCATCCAGGAGT      | ATGAGCGTGTCACTGCAAAG     |
| <i>DLL1</i>                     | TGTGCCTCAAGCACTACCAG      | TTCTGTTGCGAGGTCATCAG     |
| <i>BRACHYURY</i>                | ACCCAGTTCATAGCGGTGAC      | CATTGGGAGTACCCAGGTTG     |
| <i>MEOX1</i>                    | GAGATTGCGGTAACCTGGA       | GAACTTGGAGAGGCTGTGGA     |
| <i>PARAXIS</i>                  | TCCTGGAGAGCTGTGAGGAT      | CACACCCTGTCACCAACAGT     |
| <i>PAX3</i>                     | AGGAAGGAGGCAGAGGAAAG      | CAGCTGTTCTGCTGTGAAGG     |
| <i>MYOD</i>                     | CACTCCGGTCCCAAATGTAG      | TTCCCTGTAGACCCACACAC     |
| <i>MYOG</i>                     | TGGGCGTGTAAGGTGTGTAA      | CGATGTACTGGATGGCACTG     |
| <i>PAX7</i>                     | GGGATTCCCTTTGGAAGTGT      | CGGCAAAGAATCTTGAGAC      |
| <i>FGFR4</i>                    | CTGACCTTCGGACCCTATTCC     | GCTGAAGACAGAATCGCTGG     |
| <i>NCAD</i>                     | AGGATCAACCCCATACACCA      | TGGTTTGACCACGGTGACTA     |
| <i>PAX1</i>                     | CGTCAGCATCCCGCTCAT        | ACACGCCGTGCTGGTTGGAG     |
| <i>PAX9</i>                     | ACAGTGTGCTCCTTCTGGT       | ATGTGAGACCTGGGAATTGG     |
| <i>NKX3.2</i>                   | CAGAAATTCTCCCAAAGATGC     | TCTCCCTACAGTTTCGCCG      |
| <i>EN1</i>                      | GACTCGGACAGGTGCTATCG      | AGTTCGCAGTTTCGTCCCTT     |
| <i>ALX4</i>                     | TCCACTGCATATGAGCTGC       | GTTGTTGCCGAGCCAGGA       |
| <i>NOGGIN</i>                   | CCTCATCGAACCCAGACC        | CATGAAGCCTGGGTCGTAGTG    |
| <i>MSX1</i>                     | CACACTGCTCCAGTTTCACC      | AGGGACTCTCCAGCCACTT      |
| <i>EGFL6</i>                    | AAGGCATCACGGTTGTTAG       | CGGTGTATCCTGGAAGCAT      |
| <i>PDGFR<math>\alpha</math></i> | GGCCCCATTTACATCATCAC      | CATAGCTCCGTGTGCTTTCA     |
| <i>DLK1</i>                     | CGGCTTCATGACAAGACCT       | GTGAGACCTGTGAACCTCGGG    |
| <i>SCX</i>                      | CCCAAACAGATCTGCACCTTC     | GCGAATCGTGTCTTTCTGTC     |
| <i>MKX</i>                      | CGCACAGACACTCTGGAAAA      | AGCGGCACTTTGACAGTCTT     |

|                |                         |                         |
|----------------|-------------------------|-------------------------|
| <i>COL1A1</i>  | GGACACAGAGGTTTCAGTGGT   | GCACCATCATTTCCACGAGC    |
| <i>COL1A2</i>  | GGATGAGGAGACTGGCAACC    | TTGCCCTCAGCAACAAGTTC    |
| <i>CD44</i>    | GCAATGCTTCTCAGACCACA    | GAGGGGAGAGGGTAGACAGG    |
| <i>CD73</i>    | GCCGCTTTAGAGAATGCAAC    | CTCGACACTTGGTGCAAAGA    |
| <i>CD105</i>   | CACTAGCCAGGTCTCGAAGG    | CTGAGGACCAGAAGCACCTC    |
| <i>PAI1</i>    | TCCAGCAGCTGAATTCCTG     | GCTGGAGACATCTGCATCCT    |
| <i>MMP1</i>    | GTGTCTCACAGCTTCCCAGCGAC | GCACTCCACATCTGGGCTGCTTC |
| <i>ACVR1</i>   | GCGGTAATGAGGACCACTGT    | CCCTGCTCATAAACCTG       |
| <i>SOX9</i>    | GACTTCCGCGACGTGGAC      | GTTGGGCGGCAGGTACTG      |
| <i>ACAN</i>    | TCGAGGACAGCGAGGCC       | TCGAGGGGTAGCGGTAGAGA    |
| <i>IHH</i>     | CGGTGGACATCACCATCA      | CGTGGGCCTTTGACTCGTAA    |
| <i>COL2A1</i>  | GGCAATAGCAGGTTACGTACA   | CGATAACAGTCTTGCCCCACTT  |
| <i>RUNX2</i>   | TTACTTACACCCGCCAGTC     | TATGGAGTGCTGCTGGTCTG    |
| <i>COMP</i>    | GTCTTGGACACAACCATGCG    | CGCAGCTGATGGGTCTCATA    |
| <i>COL10A1</i> | CCCAGCACGCAGAATCCATC    | AGTGGGCCTTTTATGCCTGT    |
| <i>FGFR3</i>   | AGTACCTGGACCTGTCCGGC    | CCTCACATTGTTGGGGACCA    |
| <i>SP7</i>     | ATCCAGCCCCCTTTACAAGC    | TAGCATAGCCTGAGGTGGGT    |
| <i>VEGFA</i>   | CAATCGAGACCCTGGTGGAC    | TCTCTCTATGTGCTGGCCT     |
| <i>MMP13</i>   | CATGAGTTCGGCCACTCCTT    | CCTGGACCATAGAGAGACTGGA  |
| <i>OPN</i>     | GCCAGCAACCGAAGTTTCA     | AACCACACTATCACCTCGGC    |
| <i>CD90</i>    | AGGGCACCTACACGTGTGCA    | GCACTGGAACCTGAGGCTTCC   |
| <i>KDR</i>     | GCGATGGCCTCTTCTGTAAG    | ACACGACTCCATGTTGGTCA    |
| <i>HAND1</i>   | CACTCTCCACCCTTTTGGGA    | TCCTGCGTCTGGTTCTCTTT    |
| <i>FOXF1</i>   | TCTTTGTGCGAACCAACTTGC   | AGCGAAGGAAGAGGAGGAAC    |
| <i>SOX10</i>   | GAGCTGGACCCGACACCTTGGG  | AACGCCACCTCCTCGGACCTC   |
| <i>TFAP2A</i>  | AAGAGTTCACCGACCTGCTG    | AGGGCCTCGGTGAGATAGTT    |
| <i>P75NTR</i>  | CCGTTGGATTACACGGTCCA    | GACAGGGATGAGGTTGTCCG    |

**Table S2. Antibodies for immunostaining and intracellular flow cytometry analysis.**

|        | NAME                                                  | Hosts  | Company          | Cat. No   | Dilution |
|--------|-------------------------------------------------------|--------|------------------|-----------|----------|
| 1st    | TBX6                                                  | Goat   | R&D              | AF4744    | 1/50     |
|        | CDX2                                                  | Mouse  | BioGenex         | CDX2-88   | 1/200    |
|        | BRACHYURY                                             | Goat   | R&D              | AF2085    | 1/200    |
|        | PARAXIS                                               | Rabbit | Santacruz        | sc-98796  | 1/50     |
|        | MEOX1                                                 | Rabbit | abcam            | ab75895   | 1/50     |
|        | CDH11                                                 | Mouse  | Cell Signaling   | 13577     | 1/2000   |
|        | PAX3                                                  | Mouse  | DSHB             | Clone:C2  | 1/500    |
|        | MHC(clone: MF20)                                      | Mouse  | eBioscience      | 14-6503   | 1/800    |
|        | MHC(clone: H300)                                      | Rabbit | Santacruz        | sc-20641  | 1/200    |
|        | MYOD                                                  | Rabbit | abcam            | ab133627  | 1/500    |
|        | MYOG                                                  | Mouse  | Santacruz        | sc-12732  | 1/400    |
|        | PAX1                                                  | Rabbit | abcam            | ab95227   | 1/50     |
|        | PAX9                                                  | Rabbit | GeneTex          | GTX104454 | 1/50     |
|        | NKX3.2                                                | Rabbit | Sigma            | HPA027564 | 1/50     |
|        | Type II collagen                                      | Mouse  | ThermoScientific | MS-235    | 1/500    |
|        | ALX4                                                  | Goat   | Santacruz        | sc-22066  | 1/50     |
|        | EN1                                                   | Rabbit | abcam            | ab70993   | 1/50     |
|        | PDGFRa                                                | Goat   | R&D              | AF307     | 1/100    |
|        | SCX                                                   | Rabbit | abcam            | ab58655   | 1/50     |
|        | MKX                                                   | Rabbit | Atlas antibodies | A83377    | 1/50     |
| COL1A1 | Rabbit                                                | abcam  | ab34710          | 1/100     |          |
| COL1A2 | Rabbit                                                | abcam  | ab96723          | 1/100     |          |
| 2nd    | Novex Goat anti Mouse IgG(H+L) secondary antibody555  |        | Invitrogen       | A21422    | 1/500    |
|        | Novex Goat anti Rabbit IgG(H+L) secondary antibody555 |        | Invitrogen       | A21428    | 1/500    |
|        | Novex Donkey anti Goat IgG(H+L) secondary antibody555 |        | Invitrogen       | A21432    | 1/500    |
|        | Novex Goat anti Rabbit IgG(H+L) secondary antibody647 |        | Invitrogen       | A21245    | 1/500    |
|        | Novex Donkey anti Goat IgG(H+L) secondary antibody647 |        | Invitrogen       | A21447    | 1/500    |

**Table S3. Antibodies for FACS.**

| NAME                     | Host species | Company     | Cat. No  | Dilution |
|--------------------------|--------------|-------------|----------|----------|
| DLL1 APC-conjugated      | Mouse        | R&D         | FAB1818A | 1/200    |
| CD44 PE-conjugated       | Mouse        | BD          | 555479   | 1/50     |
| CD45 APC-conjugated      | Mouse        | BD          | 340943   | 1/50     |
| CD73 PE-conjugated       | Mouse        | BD          | 550257   | 1/50     |
| CD105 APC-conjugated     | Mouse        | eBioscience | 17-1057  | 1/50     |
| CD140a BV421-conjugated  | Mouse        | BD          | 562799   | 1/100    |
| CD31 Alexa647-conjugated | Mouse        | Biolegend   | 303112   | 1/50     |
| BV421 Isotype Control    | Mouse        | BD          | 562439   | 1/100    |
| APC Isotype Control      | Mouse        | BD          | 565381   | 1/200    |

### Supplemental references

**Fukuta M., Nakai Y., Kirino K., Nakagawa M., Sekiguchi K., Nagata S., Matsumoto Y., Yamamoto T., Umeda K., Heike T., et al.** 2014. Derivation of mesenchymal stromal cells from pluripotent stem cells through a neural crest lineage using small molecule compounds with defined media. *PLoS One*, **9**, e112291.

**Iyer D., Gambardella L., Bernard W. G., Serrano F., Mascetti V. L., Pedersen R. A., Talasila A. & Sinha S.** 2015. Robust derivation of epicardium and its differentiated smooth muscle cell progeny from human pluripotent stem cells. *Development*.
